# Supplementary material for: Structural Engineering of Hierarchical Aerogels Comprised of Multi-dimensional Gradient Carbon Nanoarchitectures for Highly Efficient Microwave Absorption
Source: PubMed Central journal article supplement (PMC8206232; doi:10.1007/s40820-021-00667-7), 2021-06-15
Supplement: 40820_2021_667_MOESM1_ESM.pdf [file 40820_2021_667_MOESM1_ESM.pdf]

Supporting Information for

## Structural Engineering of Hierarchical Aerogels Comprised of Multidimensional Gradient Carbon Nanoarchitectures for Highly Efficient Microwave Absorption

Yongpeng Zhao<sup>1,2</sup>, Xueqing Zuo<sup>1</sup>, Yuan Guo<sup>1</sup>, Hui Huang<sup>1</sup>, Hao Zhang<sup>1</sup>, Ting Wang<sup>1</sup>, Ningxuan Wen<sup>1</sup>, Huan Chen<sup>1,2</sup>, Tianze Cong<sup>1</sup>, Javid Muhammad<sup>1</sup>, Xuan Yang<sup>3</sup>, Xinnan Wang<sup>4</sup>, Zeng fan<sup>1,\*</sup>, Lujun Pan<sup>1,\*</sup>

<sup>1</sup>School of Physics, Dalian University of Technology, Dalian, Liaoning 116024, P. R. China

<sup>2</sup>School of Microelectronics, Dalian University of Technology, Dalian, Liaoning 116024, P. R. China

<sup>3</sup>School of Materials Science and Engineering, Dalian University of Technology, Dalian, Liaoning 116024, P. R. China

<sup>4</sup>School of Chemical Engineering, Dalian University of Technology, Dalian, Liaoning 116024, P. R. China

\*Corresponding authors. E-mail: [lpn@dlut.edu.cn](mailto:lpn@dlut.edu.cn) (L. Pan); [fanzeng@dlut.edu.cn](mailto:fanzeng@dlut.edu.cn) (Z. Fan)

### Supplementary Tables and Figures

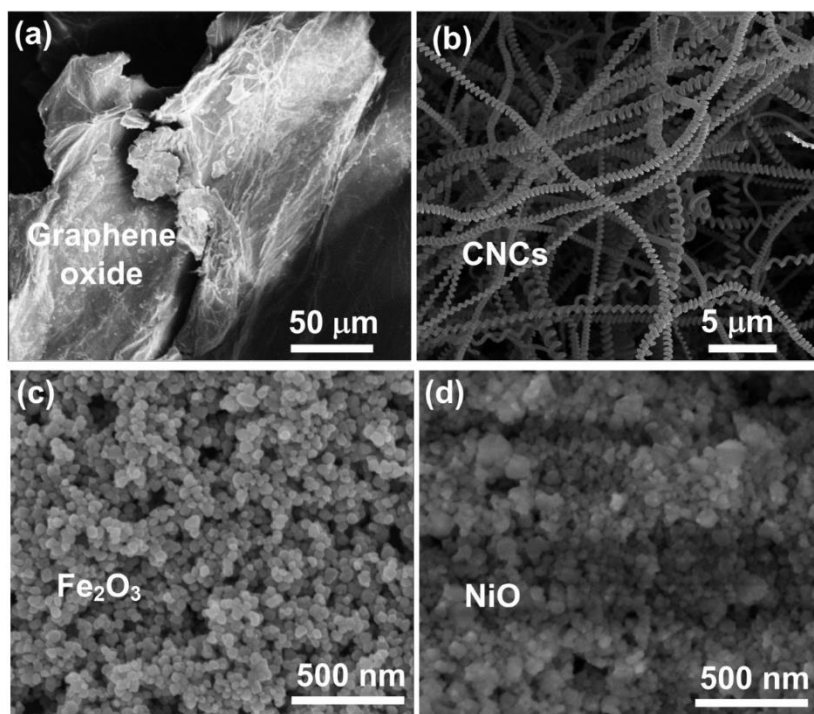

**Fig. S1** SEM images of (a) graphene oxide, (b) CNCs, (c) Fe<sub>2</sub>O<sub>3</sub>, and (d) NiO

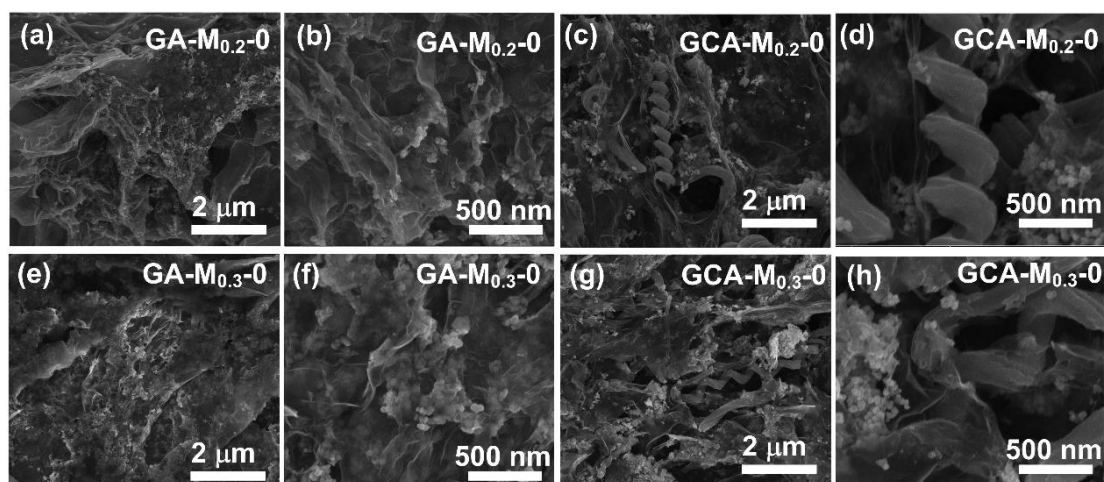

**Fig. S2** SEM images of (a, b) GA-M<sub>0.2-0</sub>, (c, d) GCA-M<sub>0.2-0</sub>, (e, f) GA-M<sub>0.3-0</sub>, and (g, h) GCA-M<sub>0.3-0</sub>, respectively

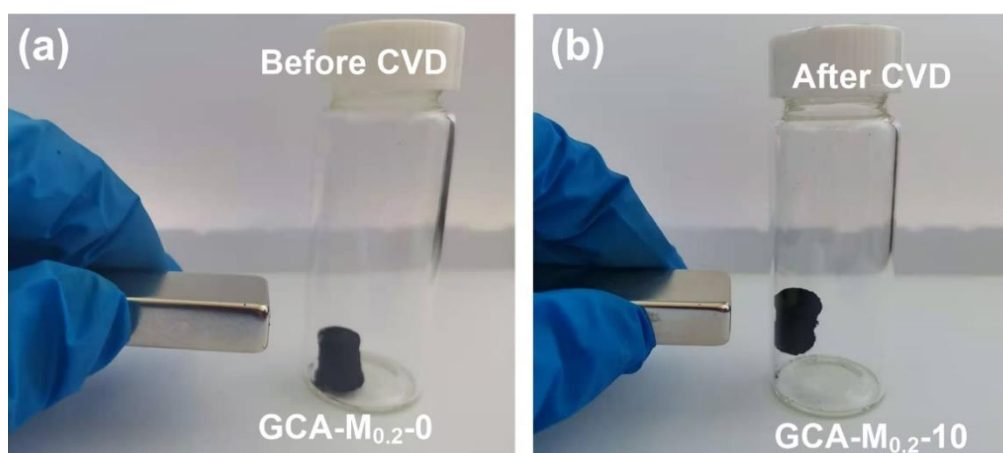

**Fig. S3** Optical image of a GCA-M<sub>0.2-0</sub> aerogel before (a) and after (b) the CVD process

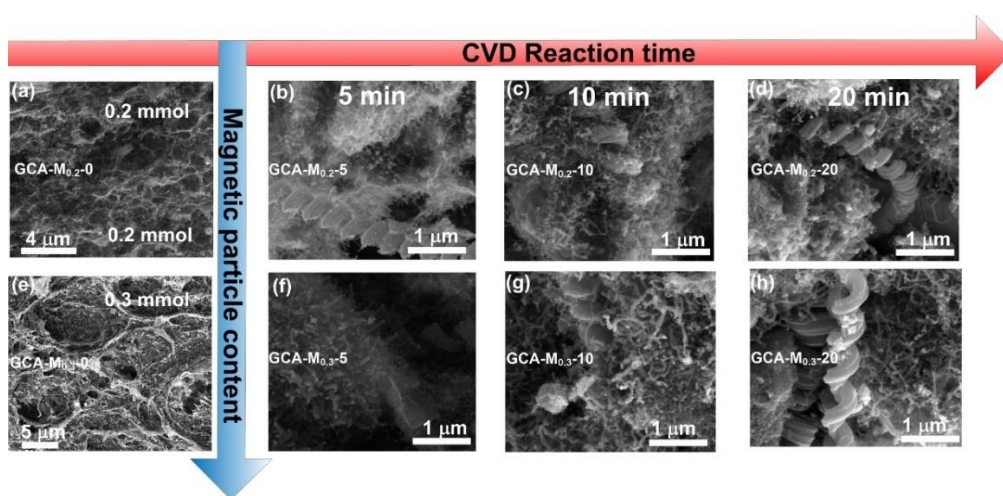

**Fig. S4** SEM images of (a) GCA-M<sub>0.2-0</sub>, (b) GCA-M<sub>0.2-5</sub>, (c) GCA-M<sub>0.2-10</sub>, (d) GCA-M<sub>0.2-20</sub>, (e) GCA-M<sub>0.3-0</sub>, (f) GCA-M<sub>0.3-5</sub>, (g) GCA-M<sub>0.3-10</sub>, and (h) GCA-M<sub>0.3-20</sub>

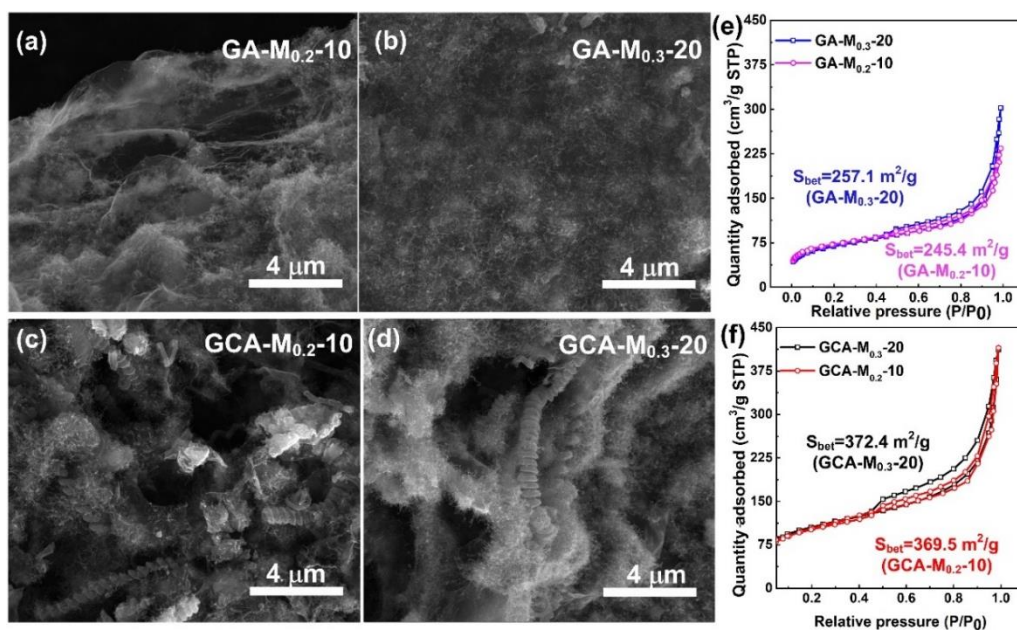

**Fig. S5** SEM images of (a) GA-M<sub>0.2-10</sub>, (b) GA-M<sub>0.3-20</sub>, (c) GCA-M<sub>0.2-10</sub>, and (d) GCA-M<sub>0.3-20</sub>, respectively. The N<sub>2</sub> adsorption-desorption isotherms of (e) GA-M<sub>0.2-10</sub> and GA-M<sub>0.3-20</sub>, (f) GCA-M<sub>0.2-10</sub> and GCA-M<sub>0.3-20</sub>

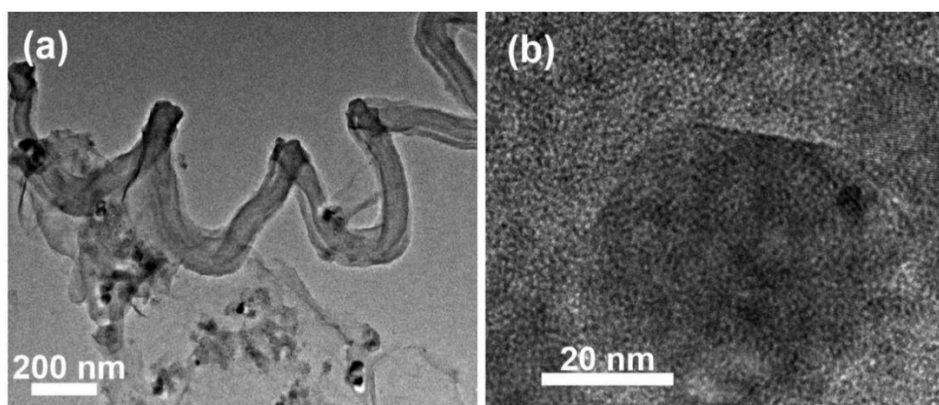

**Fig. S6** (a) TEM and (b) TRTEM images of all the GCA-M<sub>0.2-0</sub> samples

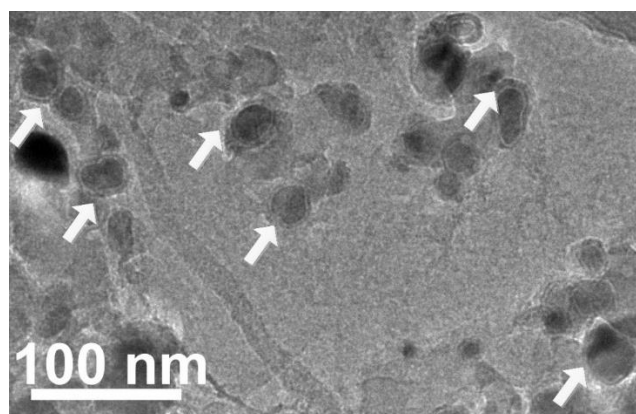

**Fig. S7** Detailed TEM image of core-shell structured particles in GCA-M<sub>0.3-20</sub>

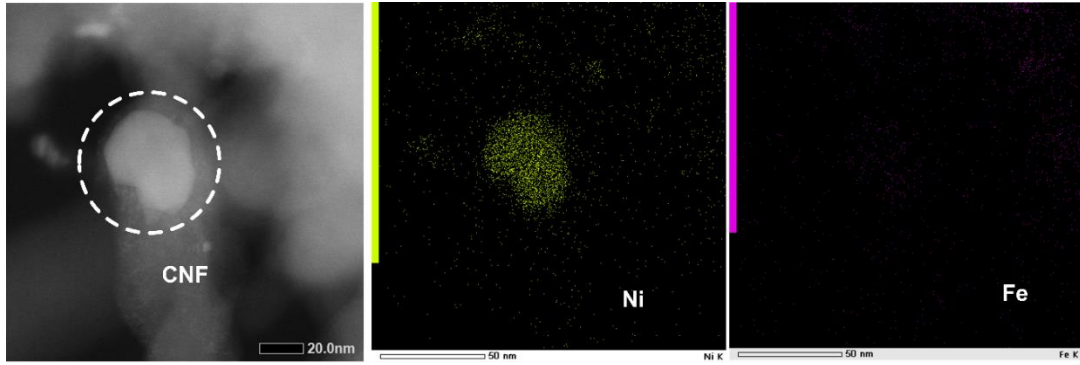

Fig. S8 Elemental maps of Ni and Fe in the tip of CNF

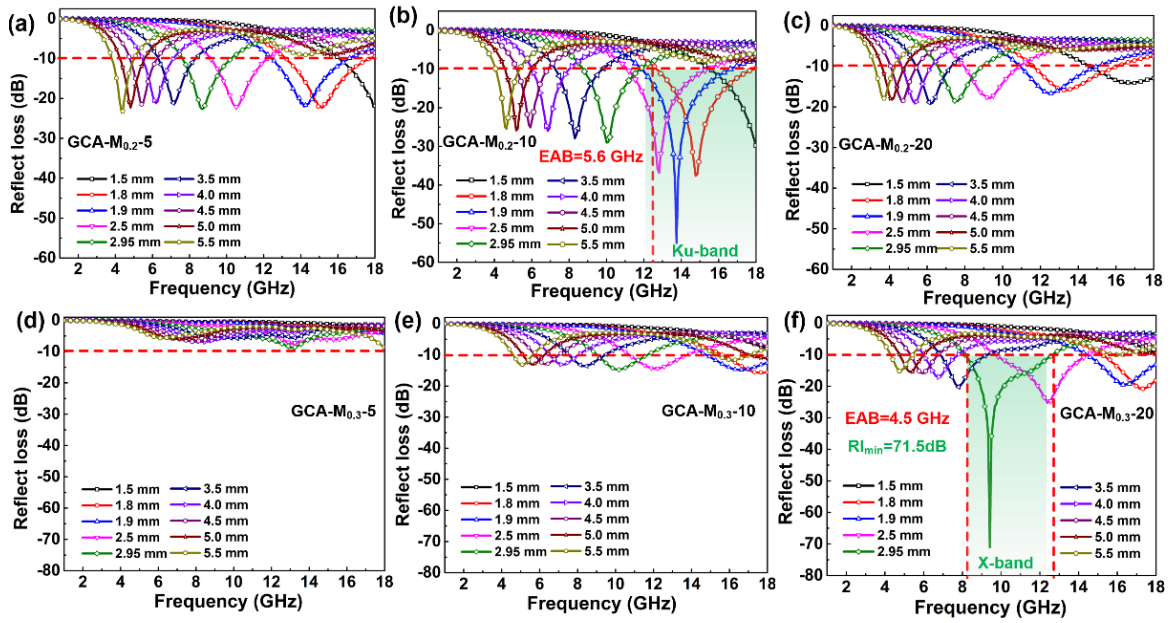

Fig. S9 Reflection loss values of (a) GCA-M<sub>0.2</sub>-5, (b) GCA-M<sub>0.2</sub>-10, (c) GCA-M<sub>0.2</sub>-20, (d) GCA-M<sub>0.3</sub>-5, (e) GCA-M<sub>0.3</sub>-10, and (f) GCA-M<sub>0.3</sub>-20

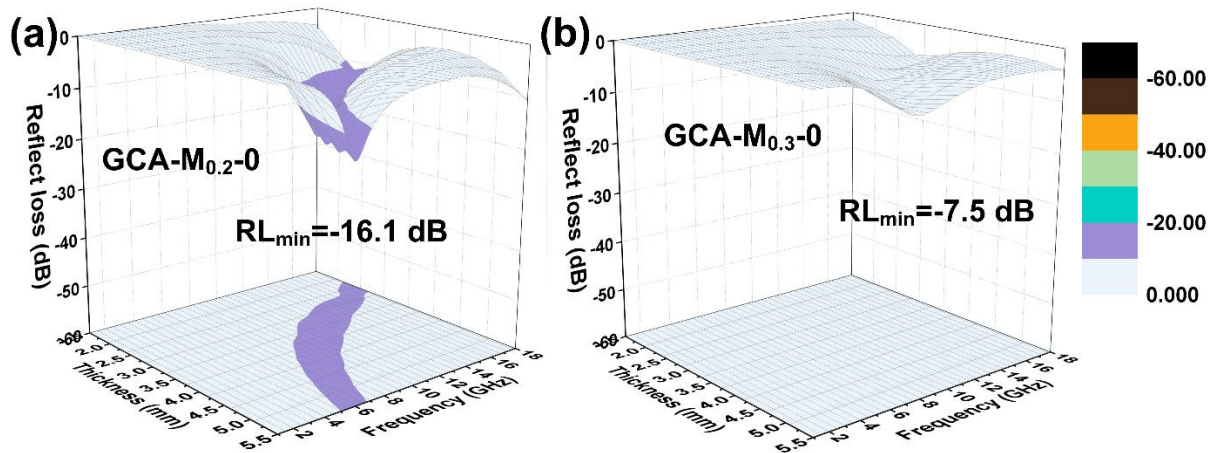

Fig. S10 3D representations of the RL of (a) GCA-M<sub>0.2</sub>-0, (b) GCA-M<sub>0.3</sub>-0

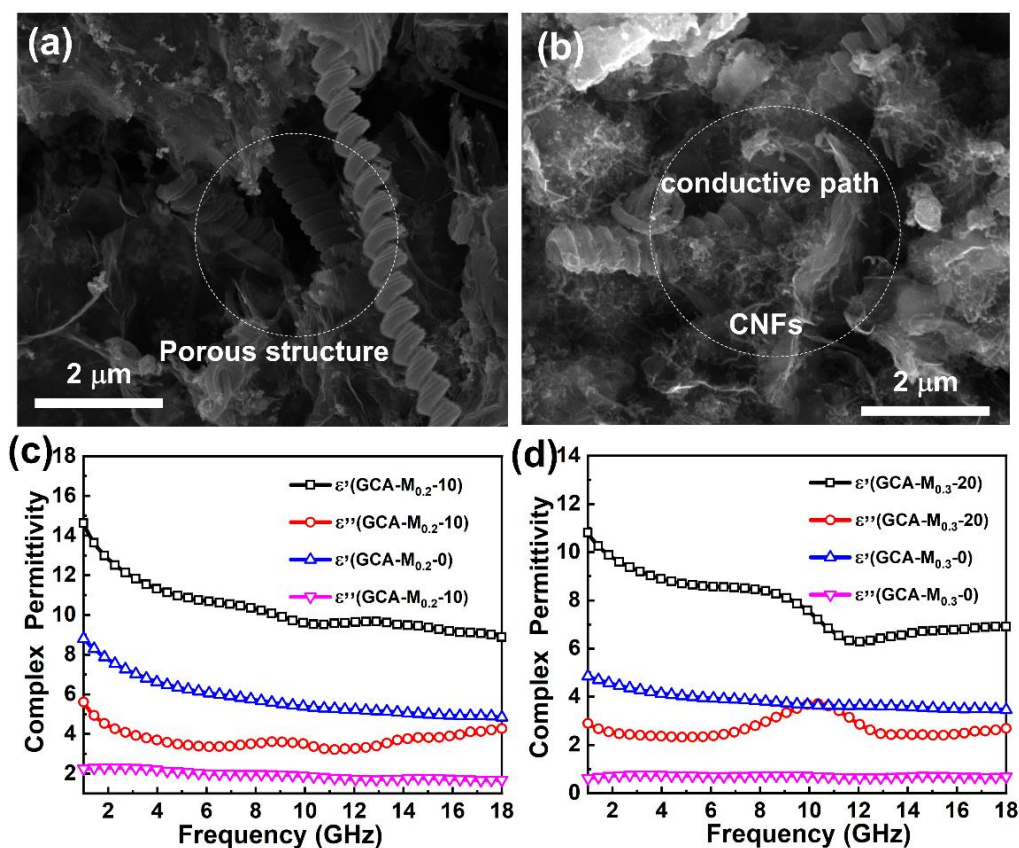

**Fig. S11** SEM images of (a) GCA-M<sub>0.2</sub>-0, (b) GCA-M<sub>0.2</sub>-10; (c) Complex permittivity of GCA-M<sub>0.2</sub>-0 and GCA-M<sub>0.2</sub>-10; (d) Complex permittivity of GCA-M<sub>0.3</sub>-0 and GCA-M<sub>0.3</sub>-20

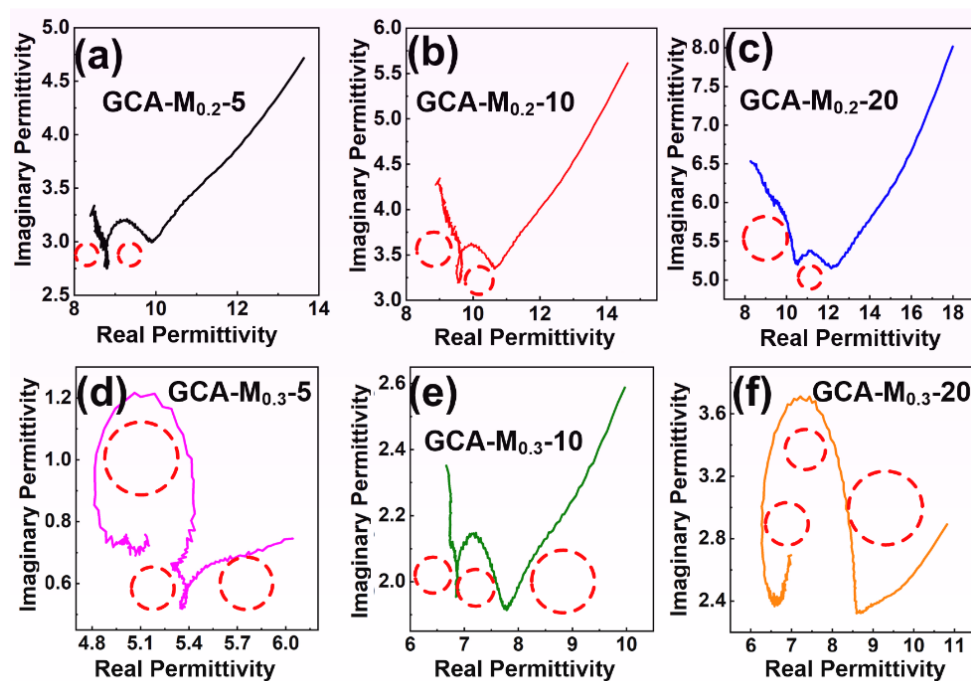

**Fig. S12** Cole-Cole curves of (a) GCA-M<sub>0.2</sub>-5, (b) GCA-M<sub>0.2</sub>-10, (c) GCA-M<sub>0.2</sub>-20, (d) GCA-M<sub>0.3</sub>-5, (e) GCA-M<sub>0.3</sub>-10, and (f) GCA-M<sub>0.3</sub>-20

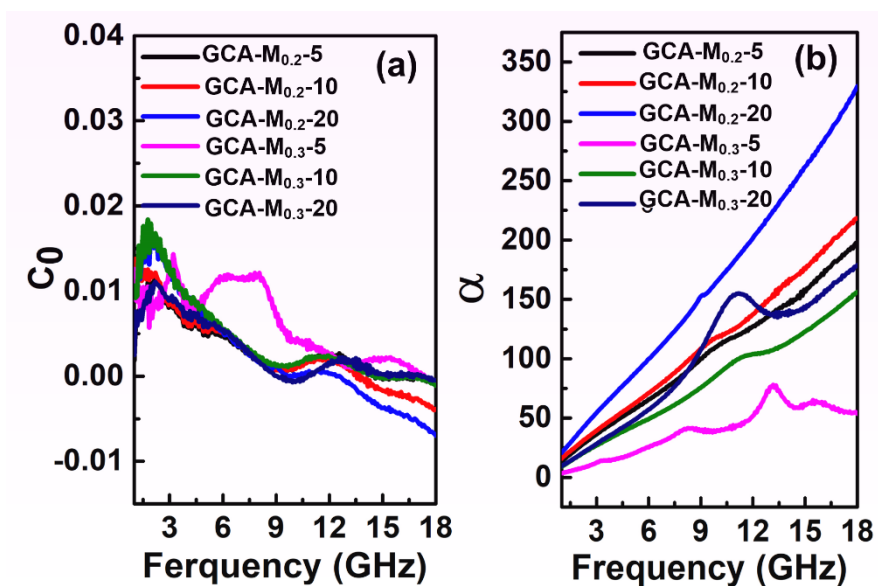

Fig. S13 Calculated  $C_0$  (a) and  $\alpha$  values (b) of as-obtained samples

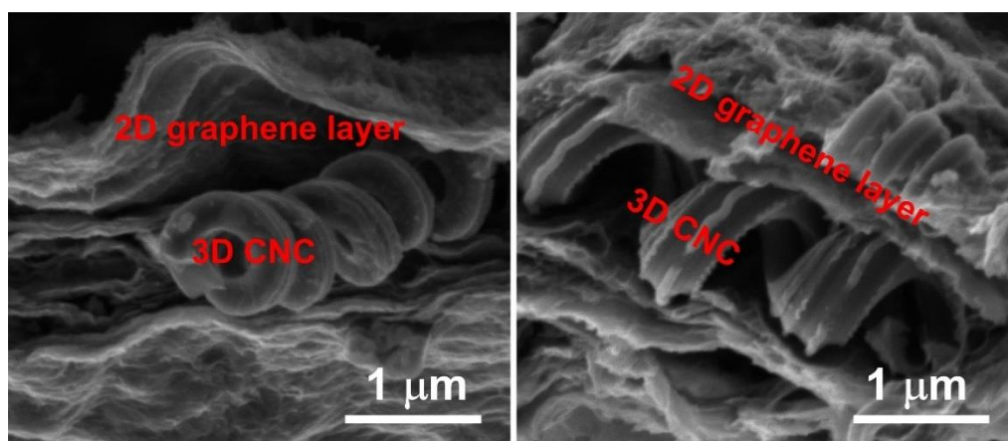

Fig. S14 Detailed SEM images of CNC and reduced graphene oxide existing in the RGO/CNC aerogel

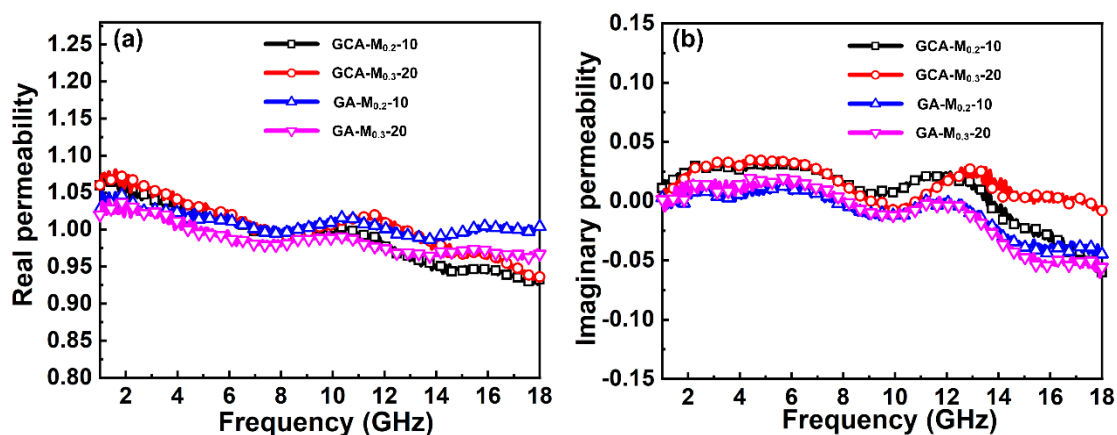

Fig. S15 (a) Real- and (b) imaginary- permeability for GCA-M<sub>0.2</sub>-10-, GCA-M<sub>0.3</sub>-20-, GA-M<sub>0.2</sub>-10-, and GA-M<sub>0.3</sub>-20-wax composites

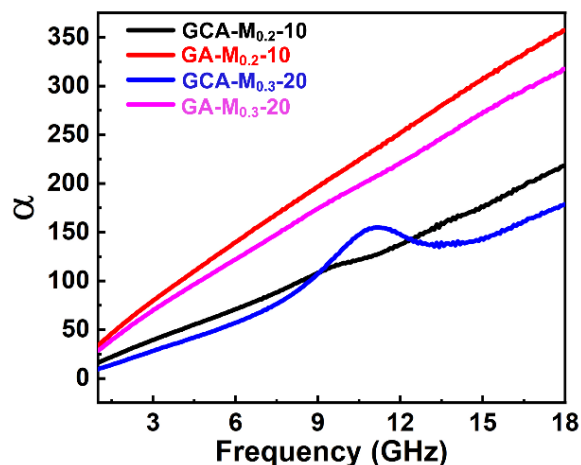

**Fig. S16** Calculated attenuation constants of typical GA-M<sub>X</sub>-Y and GCA-M<sub>X</sub>-Y samples

**Table S1** A comparison of specific surface for hierarchical RGO-based materials

| Absorbers                                                               | Methods              | Specific Surface Area(m <sup>2</sup> /g) | Refs.            |
|-------------------------------------------------------------------------|----------------------|------------------------------------------|------------------|
| Porous Fe <sub>3</sub> O <sub>4</sub> /rGO                              | solvothermal         | 148                                      | [S1]             |
| Fe <sub>3</sub> O <sub>4</sub> @SiO <sub>2</sub> @MnO <sub>2</sub> -RGO | self-assembly        | 98.5                                     | [S2]             |
| Nanoporous RGO-CNT                                                      | self-assembly        | 231.4                                    | [S3]             |
| Porous Graphene Microflowers                                            | spray-drying         | 230                                      | [S4]             |
| CNF/rGO                                                                 | electrospinning      | 43.8                                     | [S5]             |
| MoS <sub>2</sub> @ CNT/RGO                                              | solvothermal         | 237                                      | [S6]             |
| Co/Co <sub>3</sub> O <sub>4</sub> /CNTs/RGO                             | solvothermal         | 194.6                                    | [S7]             |
| nitrogen-doped rGO-CNT                                                  | pyrolysis            | 125.29                                   | [S8]             |
| β-FeOOH/rGO/CNT                                                         | self-assembly        | 293.1                                    | [S9]             |
| <b>GCA-M<sub>0.3</sub>-20</b>                                           | <b>self-assembly</b> | <b>372.4</b>                             | <b>This work</b> |
| <b>GCA-M<sub>0.2</sub>-10</b>                                           | <b>self-assembly</b> | <b>369.5</b>                             | <b>This work</b> |

**Table 2** A comparison of microwave absorption performance of hierarchical carbon-based materials in X-band

| Absorbers                              | Thickness (mm) | RL <sub>min</sub> (dB) | EAB <sub>min</sub> (GHz) | Filler loading | Refs.            |
|----------------------------------------|----------------|------------------------|--------------------------|----------------|------------------|
| Graphene spheres-AC                    | 3.7            | -32.4                  | 4.2 (3.50 mm)            | 10 %           | [S10]            |
| RGO-NiZnFeO <sub>4</sub>               | 2.91           | -63                    | 5.4 (2.00 mm)            | 40 %           | [S11]            |
| RGO-SnO <sub>2</sub>                   | 2.2            | -53.7                  | 3.7 (2.20 mm)            | 70 %           | [S12]            |
| RGO-CNT-Fe <sub>3</sub> O <sub>4</sub> | 4              | -49                    | 4.1 (2.50 mm)            | 15 %           | [S13]            |
| N-doped Graphene                       | 2.9            | -43.2                  | 5.0 (2.90 mm)            | 40 %           | [S14]            |
| CoFe <sub>2</sub> O <sub>4</sub> -RGO  | 2.1            | -60.1                  | 4.8 (2.20 mm)            | 20 %           | [S15]            |
| PPY-SiC-RGO                            | 3              | -22.5                  | 4.4 (3.0 mm)             | 20 %           | [S16]            |
| Co-C-MWCNTs                            | 2.5            | -50                    | 3.6 (2.5 mm)             | 25 %           | [S17]            |
| N-doped Carbon aerogel                 | 2.6            | -61.7                  | 5.3 (2.6 mm)             | 20 %           | [S18]            |
| <b>GCA-M<sub>0.3</sub>-20</b>          | <b>2.95</b>    | <b>-71.5</b>           | <b>4.5 (2.95 mm)</b>     | <b>15 %</b>    | <b>This work</b> |

**Table S3** A comparison of microwave absorption performance of hierarchical carbon-based materials in Ku-band

| Absorbers | Thickness (mm) | RL <sub>min</sub> (dB) | EAB (GHz) | Filler loading | Refs. |
|-----------|----------------|------------------------|-----------|----------------|-------|
|-----------|----------------|------------------------|-----------|----------------|-------|

|                                          |            |              |                     |             |                  |
|------------------------------------------|------------|--------------|---------------------|-------------|------------------|
| <b>CoFe<sub>2</sub>O<sub>4</sub>-RGO</b> | 2.1        | -60.4        | 6.4 (2.2 mm)        | 20 %        | [S15]            |
| <b>MnO<sub>2</sub>-SiC-RGO</b>           | 1.59       | -54          | 7.4 (1.59 mm)       | 50 %        | [S19]            |
| <b>CNC-Fe<sub>3</sub>O<sub>4</sub>-C</b> | 1.7        | -47.5        | 5.0 (1.5 mm)        | 40 %        | [S20]            |
| <b>CNF-CNT-Co</b>                        | 2.0        | -52.3        | 5.1 (2.0 mm)        | 15 %        | [S21]            |
| <b>LiFePO<sub>4</sub>-RGO</b>            | 2.4        | -61.4        | 4.0 (2.4 mm)        | 30 %        | [S22]            |
| <b>RGO-CNT-FeNi</b>                      | 2          | -39.3        | 4.7 (1.8 mm)        | 10 %        | [S23]            |
| <b>GRO-PEG</b>                           | 2.35       | -43.2        | 5.3 (2.35 mm)       | 50 %        | [S24]            |
| <b>Biomass Carbon-Ni</b>                 | 1.7        | -52          | 5.0 (1.65 mm)       | 15 %        | [S25]            |
| <b>Co-CNTs-Carbon Sponge</b>             | 2.2        | -51.2        | 4.1(2.2 mm)         | 10 %        | [S26]            |
| <b>FeCo-C</b>                            | 2.8        | -61.8        | 9.2 (2.8 mm)        | 10 %        | [S27]            |
| <b>CoNi/rGO</b>                          | 0.8        | -53          | 3.0 (0.8 mm)        | 7%          | [S28]            |
| <b>GCA-M<sub>0.2</sub>-10</b>            | <b>1.9</b> | <b>-55.1</b> | <b>5.6 (1.8 mm)</b> | <b>15 %</b> | <b>This work</b> |

## Supplementary References

- [S1] Z. Liu et al., Rational design of hierarchical porous Fe<sub>3</sub>O<sub>4</sub>/RGO composites with lightweight and high-efficiency microwave absorption. *Compos. Commun.* **22**, 100492 (2020). <https://doi.org/10.1016/j.coco.2020.100492>
- [S2] M. Ma et al., 1D flower-like Fe<sub>3</sub>O<sub>4</sub>@ SiO<sub>2</sub>@ MnO<sub>2</sub> nanochains inducing RGO self-assembly into aerogels for high-efficient microwave absorption. *Mater. Des.* **188**, 108462 (2020). <https://doi.org/10.1016/j.matdes.2019.108462>
- [S3] J.H. Kim et al., 3D-interconnected nanoporous RGO-CNT structure for supercapacitors application. *Electrochim. Acta* **125**, 536-542 (2014). <https://doi.org/10.1016/j.electacta.2014.01.142>
- [S4] C. Chen et al., Porous graphene microflowers for high-performance microwave absorption. *Nano-Micro Lett.* **10**(2), 26 (2018). <https://doi.org/10.1007/s40820-017-0156-2>
- [S5] S.H. Han et al., High areal capacity of Li-S batteries enabled by freestanding CNF/rGO electrode with high loading of lithium polysulfide. *Electrochim. Acta* **241**, 406-413 (2017). <https://doi.org/10.1016/j.electacta.2017.05.005>
- [S6] S.H. Wang et al., Three dimensional MoS<sub>2</sub>@ CNT/RGO network composites for high performance flexible supercapacitors. *Chem. Eur. J.* **23**(14), 3438-3446 (2017). <https://doi.org/10.1002/chem.201605465>
- [S7] Y. Wang et al., MOF-derived nanoporous carbon/Co/Co<sub>3</sub>O<sub>4</sub>/CNTs/RGO composite with hierarchical structure as a high-efficiency electromagnetic wave absorber. *J. Alloys Compd.* **846**, 156215 (2020). <https://doi.org/10.1016/j.jallcom.2020.156215>
- [S8] C.H. Guo et al., Space-confined iron nanoparticles in a 3D nitrogen-doped rGO-CNT framework as efficient bifunctional electrocatalysts for rechargeable Zinc–Air batteries. *Micropor. Mesopor. Mat.* **298**, 110100 (2020). <https://doi.org/10.1016/j.micromeso.2020.110100>
- [S9] S.W. Bokhari et al., Self-assembly of β-FeOOH/rGO/CNT for a high-



- performance supercapacitor. *Mater. Lett.* **220**, 140-143 (2018).  
<https://doi.org/10.1016/j.matlet.2018.02.131>
- [S10] H.L. Xu et al., Constructing hollow graphene nano-spheres confined in porous amorphous carbon particles for achieving full X band microwave absorption. *Carbon* **142**, 346-353 (2019). <https://doi.org/10.1016/j.carbon.2018.10.056>
- [S11] R.W. Shu et al., Facile synthesis of nitrogen-doped reduced graphene oxide/nickel-zinc ferrite composites as high-performance microwave absorbers in the X-band. *Chem. Eng. J.* **384**, 123266 (2020).  
<https://doi.org/10.1016/j.cej.2019.123266>
- [S12] J.B. Zhang et al., Facile fabrication and enhanced microwave absorption properties of reduced graphene oxide/tin dioxide binary nanocomposites in the X-band. *Synth. Met.* **257**, 116157 (2019).  
<https://doi.org/10.1016/j.synthmet.2019.116157>
- [S13] Y. Qin et al., Preparation of graphene aerogel with high mechanical stability and microwave absorption ability via combining surface support of metallic-CNTs and interfacial cross-linking by magnetic nanoparticles. *ACS Appl. Mater. Interfaces* **11**(10), 10409-10417 (2019).  
<https://doi.org/10.1021/acsami.8b22382>
- [S14] Y.L. Zhou et al., Graphene nanoflakes with optimized nitrogen doping fabricated by arc discharge as highly efficient absorbers toward microwave absorption. *Carbon* **148**, 204-213 (2019).  
<https://doi.org/10.1016/j.carbon.2019.03.034>
- [S15] X.Y. Wang, et al., CoFe<sub>2</sub>O<sub>4</sub>/N-doped reduced graphene oxide aerogels for high-performance microwave absorption. *Chem. Eng. J.* **388**, 124317 (2020).  
<https://doi.org/10.1016/j.cej.2020.124317>
- [S16] Y.H. Cheng et al., Achieving tunability of effective electromagnetic wave absorption between the whole X-band and Ku-band via adjusting PPy loading in SiC nanowires/graphene hybrid foam. *Carbon* **132**, 430-443 (2018).  
<https://doi.org/10.1016/j.carbon.2018.02.084>
- [S17] R.W. Shu et al., Nitrogen-doped Co-C/MWCNTs nanocomposites derived from bimetallic metal-organic frameworks for electromagnetic wave absorption in the X-band. *Chem. Eng. J.* **362**, 513-524 (2019).  
<https://doi.org/10.1016/j.cej.2019.01.090>
- [S18] P.B. Liu et al., Vacancies-engineered and heteroatoms-regulated N-doped porous carbon aerogel for ultrahigh microwave absorption. *Carbon* **169**, 276-287 (2020). <https://doi.org/10.1016/j.carbon.2020.07.063>
- [S19] S. Dong et al., SiC whiskers-reduced graphene oxide composites decorated with MnO nanoparticles for tunable microwave absorption. *Chem. Eng. J.* **392**, 123817 (2020). <https://doi.org/10.1016/j.cej.2019.123817>

- [S20] Y.P. Zhao et al., In situ construction of hierarchical core–shell Fe<sub>3</sub>O<sub>4</sub>@C nanoparticles–helical carbon nanocoil hybrid composites for highly efficient electromagnetic wave absorption. *Carbon* **171**, 395-408 (2021). <https://doi.org/10.1016/j.carbon.2020.09.036>
- [S21] Z.C. Wu et al., Enhanced microwave absorption performance from magnetic coupling of magnetic nanoparticles suspended within hierarchically tubular composite. *Adv. Funct. Mater.* **29**(28), 1901448 (2019). <https://doi.org/10.1002/adfm.201901448>
- [S22] J.J. Dong et al., Three-dimensional architecture reduced graphene oxide–LiFePO<sub>4</sub> composite: preparation and excellent microwave absorption performance. *Inorg. Chem.* **58**(3), 2031-2041 (2019). <https://doi.org/10.1021/acs.inorgchem.8b03043>
- [S23] J. Xu et al., N-doped reduced graphene oxide aerogels containing pod-like N-doped carbon nanotubes and FeNi nanoparticles for electromagnetic wave absorption. *Carbon* **159**, 357-365 (2020). <https://doi.org/10.1016/j.carbon.2019.12.020>
- [S24] H.M. Ji et al., Remarkable microwave absorption performance of ultralight graphene-polyethylene glycol composite aerogels with a very low loading ratio of graphene. *Compos. Part A: Appl. Sci. Manuf.* **123**, 158-169 (2019). <https://doi.org/10.1016/j.compositesa.2019.05.012>
- [S25] H.Q. Zhao et al., A novel hierarchically porous magnetic carbon derived from biomass for strong lightweight microwave absorption. *Carbon* **142**, 245-253 (2019). <https://doi.org/10.1016/j.carbon.2018.10.027>
- [S26] N. Yang et al., Ultralight three-dimensional hierarchical cobalt nanocrystals/N-doped CNTs/carbon sponge composites with a hollow skeleton toward superior microwave absorption. *ACS Appl. Mater. Interfaces* **11**(39), 35987-35998 (2019). <https://doi.org/10.1021/acsami.9b11101>
- [S27] L. Wang et al., Hierarchical nest-like structure of Co/Fe MOF derived CoFe@C composite as wide-bandwidth microwave absorber. *Compos. Part A: Appl. Sci. Manuf.* **135**, 105958 (2020). <https://doi.org/10.1016/j.compositesa.2020.105958>
- [S28] H.-B. Zhao, J.-B. Cheng, J.-Y. Zhu, Y.-Z. Wang, Ultralight CoNi/rGO aerogels toward excellent microwave absorption at ultrathin thickness. *J. Mater. Chem. C* **7**(2), 441-448 (2019). <https://doi.org/10.1039/C8TC05239E>
